# Supplementary material for: Supercapacitor based on H+ and Ni2+ co-doped polyaniline–MWCNTs nanocomposite: synthesis and electrochemical characterization
Source: Royal Society of Chemistry journal article supplement (doi:10.1039/c3ra40955d), 2013-01-01
Supplement: c3ra40955d.pdf [file c3ra40955d.pdf]

# Supercapacitor based on $H^+$ and $Ni^{2+}$ co-doped Polyaniline/MWCNTs Nanocomposite: Synthesis and electrochemical characterization

Debasis Ghosh, Soumen Giri, Avinandan Mandal, and Chapal Kumar Das\*  
Materials Science Centre, Indian Institute of Technology Kharagpur, India

\*e-mail: Chapal12@yahoo.co.in

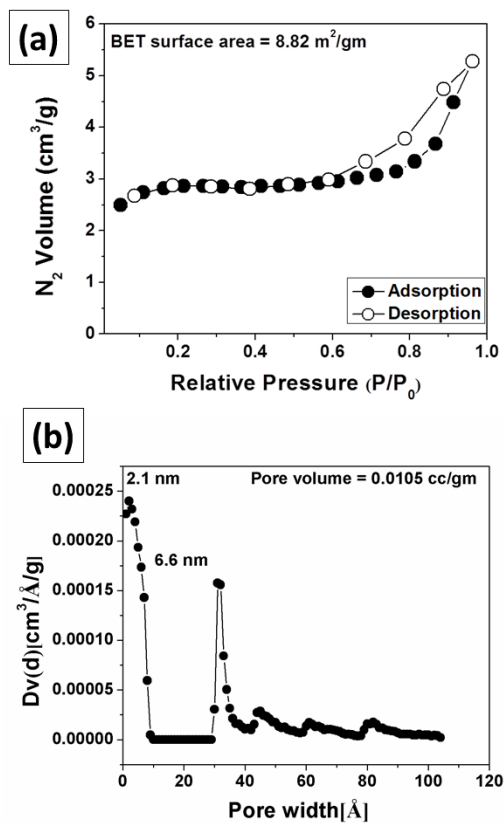

Fig. S1 (a)  $N_2$  sorption isotherms and (b) the pore size distribution of the  $H^+$  doped PANI

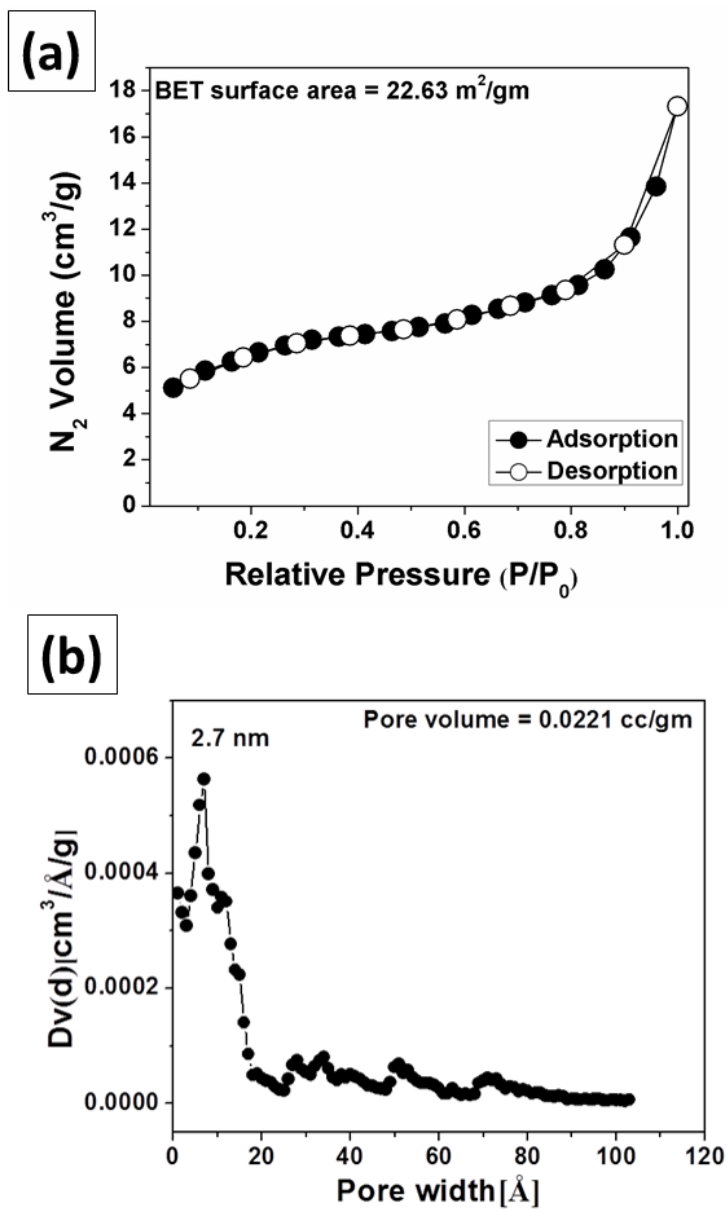

Fig. S2 (a) N<sub>2</sub> sorption isotherms and (b) the pore size distribution of the co-doped PANI
